# Supplementary material for: Defective Lysosomal Lipolysis Causes Prenatal Lipid Accumulation and Exacerbates Immediately after Birth
Source: MDPI journal article supplement (doi:10.3390/ijms221910416), 2021-09-27
Supplement: s1 [file s1]

## SUPPLEMENT

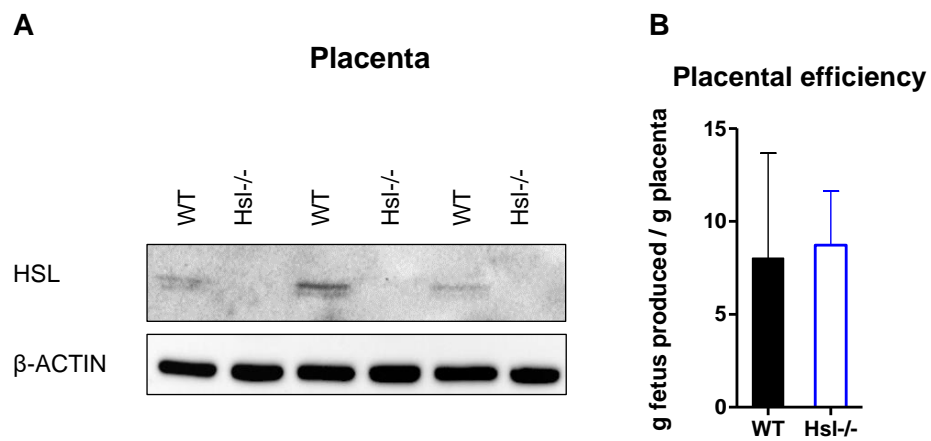

**Figure S1.** HSL deficiency does not alter placental efficiency. **(A)** Western blot analysis of placental tissue. **(B)** Placental efficiency of WT and Hsl<sup>-/-</sup> mice (n = 34 WT / 24 Hsl<sup>-/-</sup>). Data represent mean values + SD.

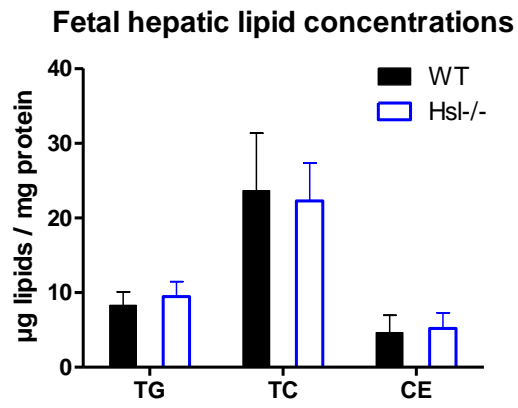

**Figure S2.** HSL deficiency does not alter hepatic lipid concentrations in the fetus. Fetal hepatic triglyceride (TG), total cholesterol (TC), and cholesteryl ester (CE) levels. Data represent mean values + SD (n= 4).

**A**

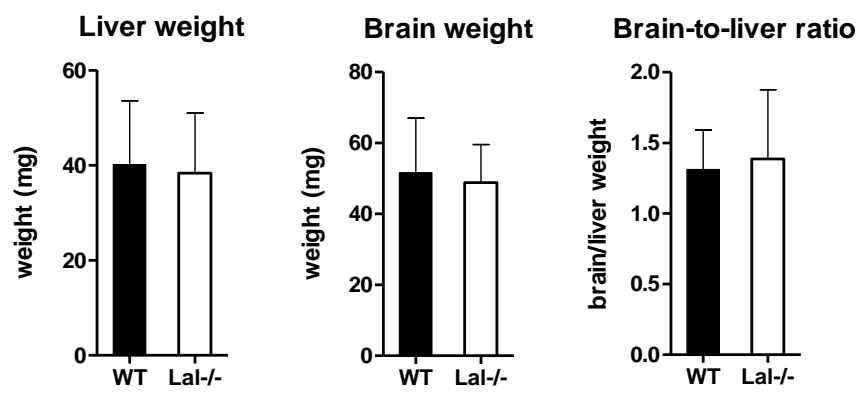

**B**

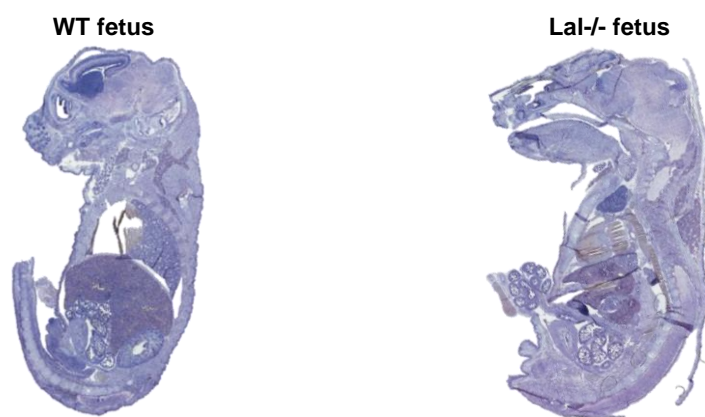

**C**

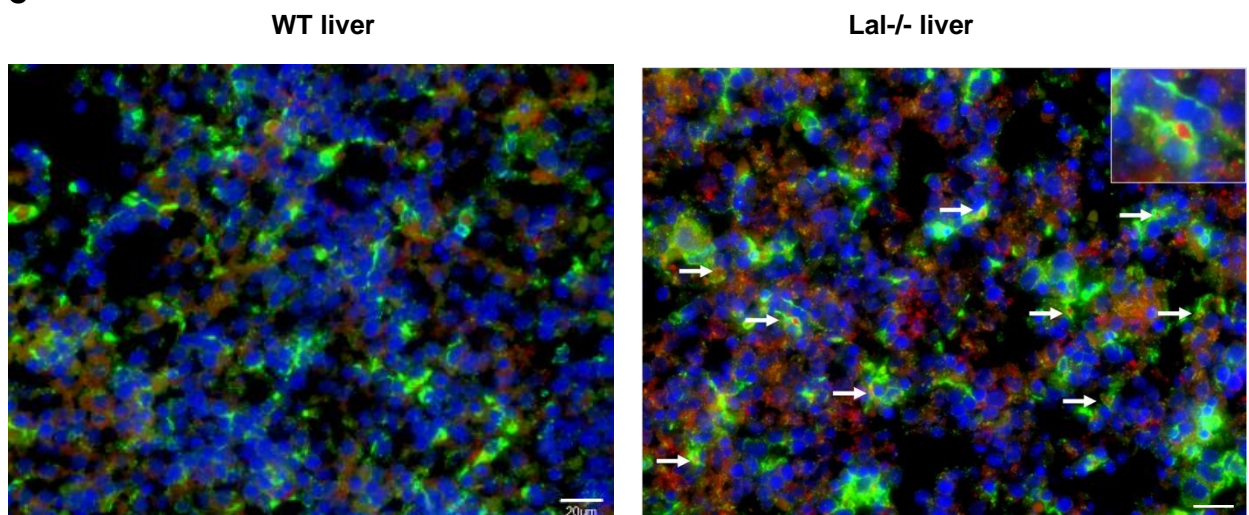

**D**

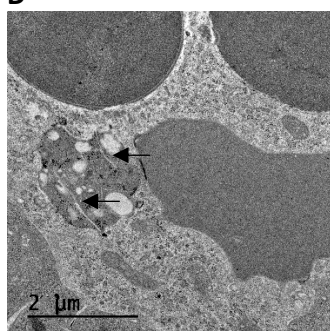

**E**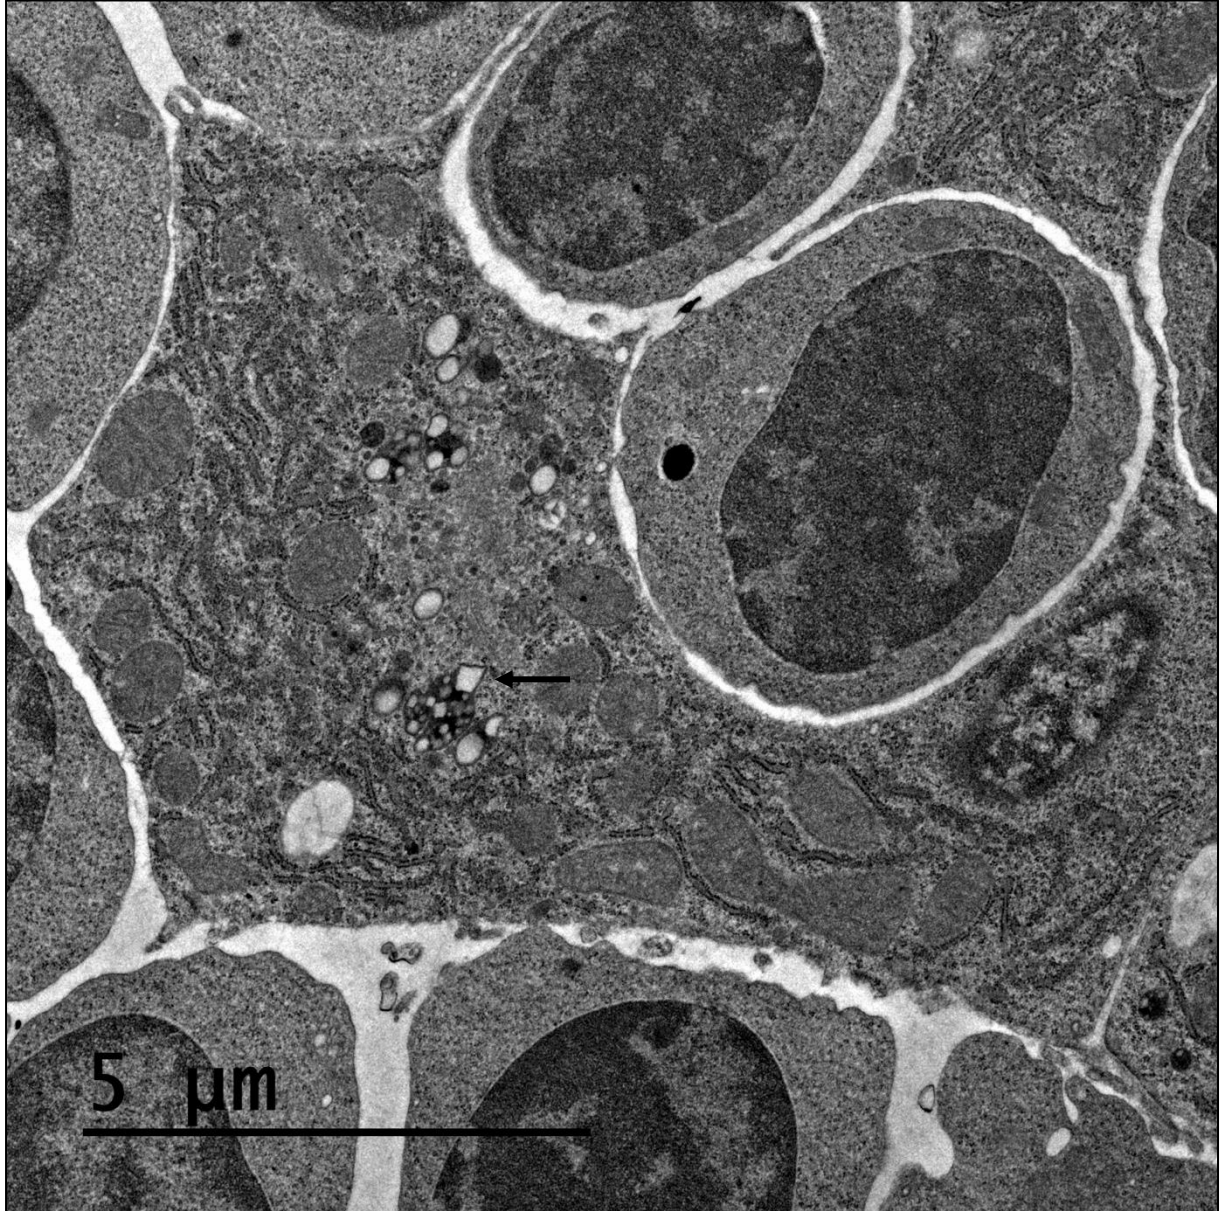

**Figure S3.** Increased abundance of lysosomal lipids in fetal *Lal*<sup>-/-</sup> livers. Fetuses were isolated from WT and *Lal*<sup>-/-</sup> mice on day 19 of pregnancy. (A) Fetal liver and brain weights and brain-to-liver ratio. Data represent mean values + SD (n = 25 WT / 29 *Lal*<sup>-/-</sup>). (B) ORO staining of a whole-body WT and *Lal*<sup>-/-</sup> fetus. (C) Immunofluorescent staining of lysosomes (LAMP1, green), neutral lipids (ORO, red), and nuclei (DAPI, blue) in fetal liver sections; white arrows indicate lipids co-localizing with lysosomes. Magnification, 40x; Scale bar, 20 μm. (D, E) Electron micrographs of *Lal*<sup>-/-</sup> fetal liver; black arrows indicate CE crystals. Scale bars, (D) 2 μm, (E) 5 μm.

**A**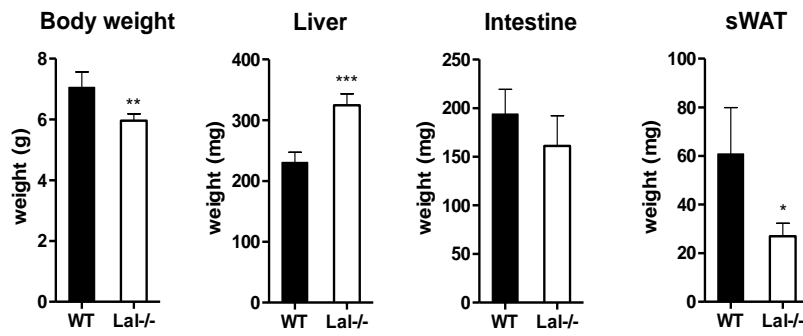**B**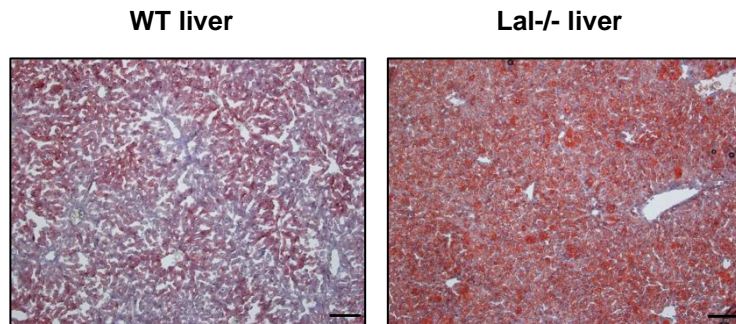**C**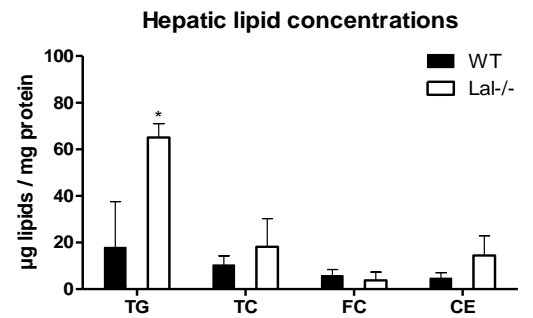**D**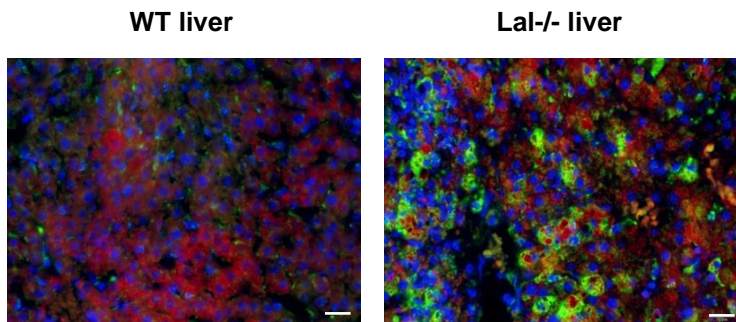**E**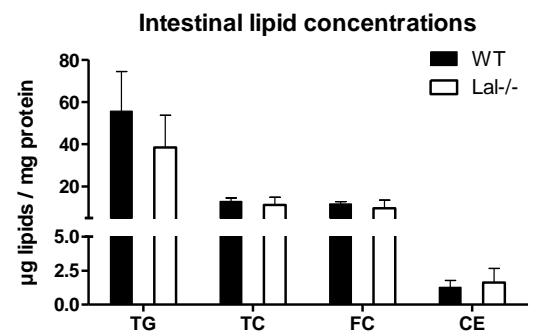

**Figure S4.** *Lal*<sup>-/-</sup> mice are severely affected by hepatic lipid accumulation already 2 weeks after birth. (A) Body and organ weights from 2-week-old WT and *Lal*<sup>-/-</sup> mice (n = 5 WT / 4 *Lal*<sup>-/-</sup>). (B) ORO staining of liver cryosections and (C) hepatic lipid concentrations (n = 4). (D) Immunofluorescent double staining for lysosomes (LAMP1, green), neutral lipids (ORO, red), and nuclei (DAPI, blue) on hepatic cryosections. Magnification, 10x; Scale bar, 100 µm. (E) Intestinal lipid concentrations (n = 3). Data represent mean values + SD. Statistically significant differences were calculated by two-tailed Student's t-test; \*  $p < 0.05$ , \*\*  $p \leq 0.01$ , \*\*\*  $p \leq 0.001$ .



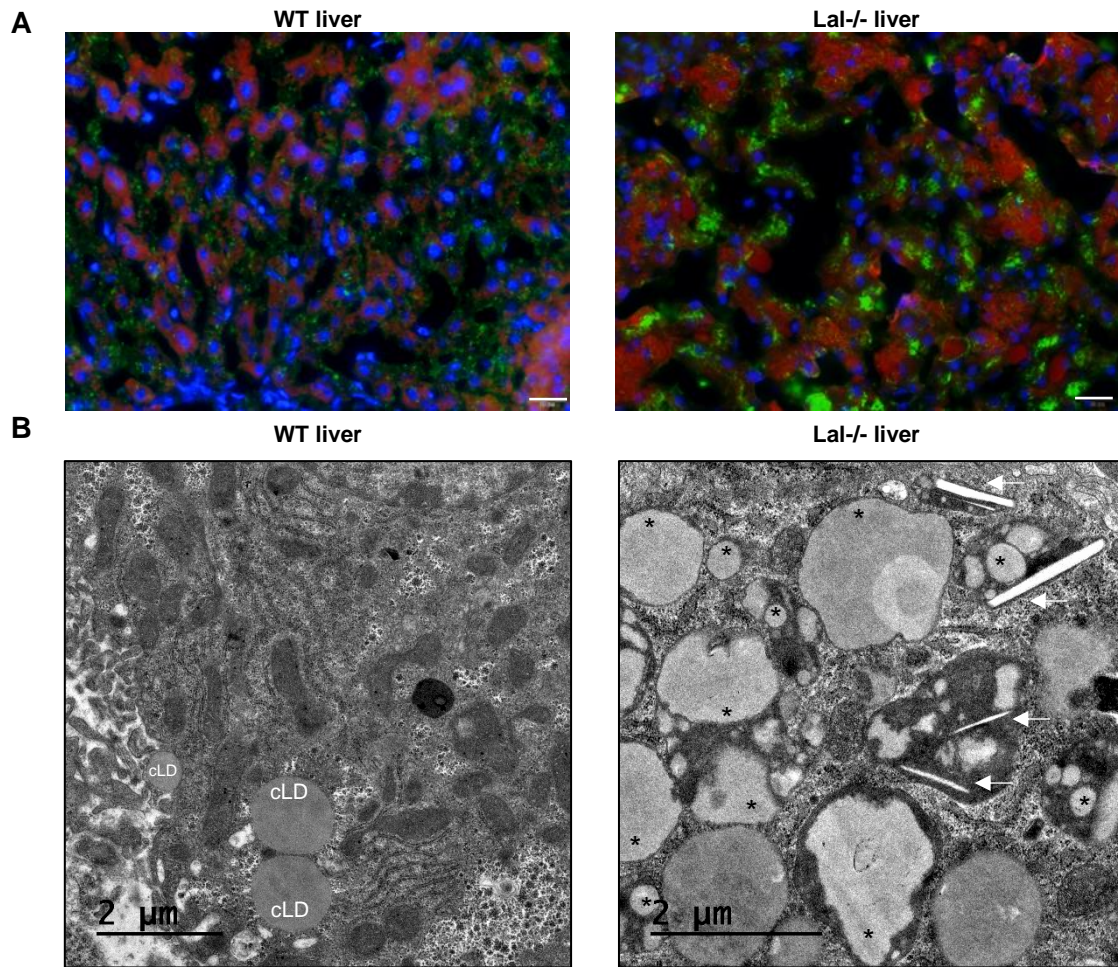

**Figure S5.** Lysosomal lipid accumulation in livers of 4-week-old *Lal*<sup>-/-</sup> mice. **(A)** Immunofluorescent staining of lysosomes (LAMP1, green), neutral lipids (ORO, red), and nuclei (DAPI, blue) on hepatic cryosections. Magnification, 20x; Scale bar, 50 μm. **(B)** Increased image size of electron micrographs of WT and *Lal*<sup>-/-</sup> livers; cLD, cytosolic lipid droplet; white arrows indicate lysosomal CE crystals, \* indicate lysosomal lipids. Scale bar, 2 μm.
